# Supplementary material for: Age-Related Decrease of Meiotic Cohesins in Human Oocytes
Source: PubMed Central journal article supplement (PMC4013030; doi:10.1371/journal.pone.0096710), 2014-05-07
Supplement: pone.0096710.s004.pdf [file pone.0096710.s004.pdf]

**Table S1 Antibodies used in this study**

| <b>Antibody</b>                            | <b>Source</b> | <b>Company</b>           | <b>Dilution</b> |
|--------------------------------------------|---------------|--------------------------|-----------------|
| hREC8                                      | Rabbit        |                          | 1:1000          |
| mREC8                                      | Guinea pig    |                          | 1:100           |
| hSMC1B                                     | Rabbit        |                          | 1:200           |
| mSMC1B                                     | Guinea pig    |                          | 1:5000          |
| SMC1A <sup>a</sup> (AB-957)                | Rabbit        | SIGMA                    | 1:100           |
| SMC1 <sup>b</sup> (ab21583)                | Rabbit        | Abcam                    | 1:1000          |
| Rad21 <sup>c</sup> (53A303)                | Mouse         | Millipore                | 1:400           |
| Rad21 <sup>d</sup> (ab42522)               | Rabbit        | Abcam                    | 1:1000          |
| SMC3 (A300-060A)                           | Rabbit        | Bethyl Laboratories      | 1:500           |
| c-Kit (M-14)                               | Goat          | Santa Cruz Biotechnology | 1:400           |
| Alexa Fluor 488-conjugated anti-rabbit IgG | Donkey        | Life Technologies        | 1:200-1000      |
| Alexa Fluor 594-conjugated anti-rabbit IgG | Donkey        | Life Technologies        | 1:200           |
| Alexa Fluor 594-conjugated anti-goat IgG   | Donkey        | Life Technologies        | 1:1000          |
| FITC-conjugated anti-guinea pig IgG        | Donkey        | Jackson ImmunoResearch   | 1:100           |
| AMCA-conjugated anti-mouse IgG             | Donkey        | Jackson ImmunoResearch   | 1:100           |
| Biotin-SP-conjugated anti-goat IgG         | Donkey        | Jackson ImmunoResearch   | 1:200           |

<sup>a</sup>For detection of hSMC1A.

<sup>b</sup>For detection of mSMC1A.

<sup>c</sup>For detection of hRAD21.

<sup>d</sup>For detection of mRAD21.
